# Supplementary material for: Exercise to improve functional outcomes in persons with osteoporosis: a systematic review and meta-analysis
Source: Springer Nature journal article supplement (doi:10.1007/s00198-017-4339-y), 2018-01-06
Supplement: MOESM1 [file 15347736]

| Additional file 1. Table 1. Database search strategy |
| --- |
| PubMed Search |
| ((("osteoporosis, postmenopausal"[MeSH Terms] OR ("osteoporosis"[All Fields] AND "postmenopausal"[All Fields]) OR "postmenopausal osteoporosis"[All Fields] OR "osteoporosis"[All Fields] OR "osteoporosis"[MeSH Terms]) OR "osteopenia"[All Fields]) AND ((((("exercise"[MeSH Terms] OR "exercise"[All Fields]) OR (("exercise"[MeSH Terms] OR "exercise"[All Fields]) AND ("education"[Subheading] OR "education"[All Fields] OR "training"[All Fields] OR "education"[MeSH Terms] OR "training"[All Fields]))) OR ("exercise therapy"[MeSH Terms] OR "exercise therapy"[All Fields])) OR ("resistance training"[MeSH Terms] OR "resistance training"[All Fields])) OR "aquatic exercise"[All Fields])) AND ((((((("activities of daily living"[MeSH Terms] OR "activities of daily living"[All Fields]) OR "functional tasks"[All Fields]) OR "physical function"[All Fields]) OR "dual tasking"[All Fields]) OR "self-perceived function"[All Fields]) OR "self-reported physical function"[All Fields]) OR "avoidance of activities"[All Fields]) |
| CINAHL search |
| | S1 | (MH "Osteoporosis+") OR "osteoporosis" |  |  | Display | | --- | --- | --- | --- | --- |  | S2 | "osteopenia" |  |  | Display | | --- | --- | --- | --- | --- |  | S3 | S1 OR S2 |  |  | Display | | --- | --- | --- | --- | --- |  | S4 | (MH "Exercise+") OR "exercise" OR (MH "Therapeutic Exercise") OR (MH "Resistance Training") OR (MH "Aquatic Exercises") OR (MH “ Strength Training”) OR (MH “Aerobic Training”) OR (MH “weight bearing”) |  |  | Display | | --- | --- | --- | --- | --- |  | S5 | (MH "Activities of Daily Living+") OR "activities of daily living" |  |  | Display | | --- | --- | --- | --- | --- |  | S6 | (MH "Bone Density") OR "bone mass" |  |  | Display | | --- | --- | --- | --- | --- |  | S7 | "bone density" |  |  | Display | | --- | --- | --- | --- | --- |  | S8 | (MH "Quality of Life+") OR "quality of life" |  |  | Display | | --- | --- | --- | --- | --- |  | S9 | S5 OR S6 OR S7 OR S8 |  |  | Display | | --- | --- | --- | --- | --- |  | S10 | S3 AND S4 AND |  |  | 714 | | --- | --- | --- | --- | --- | | *Note*. The same strategy in CINAHL used for MBASE and SPORTDiscus. | | |  |  | |

Additional file 1. Table 2.

**Evaluation of Quality of an Intervention Study**

This form is used to extract relevant data on effectiveness from your study and to rate the quality of the published study (for item interpretation see guide)

Citation: _____________________________________________

Authors: _____________________________________________

Title: ________________________________________________________________________

Reviewer: _________________________ Date: _____________________

**Patient Characteristics** (age, sex, disorder, co-morbidity/important co-variates)

1.________________________________________________________________

2.________________________________________________________________

Sample Size _____________

Interventions (Describe type, timing, frequency, equipment, provider, progression etc.)

1.________________________________________________________________

2.________________________________________________________________

**Outcome Measures** (Type and when evaluated)

Primary:_______________________________________________________

Secondary:_______________________________________________________

**Results**:

Outcomes (absolute change, significance)

Primary: _________________________________________________________

Secondary:_____________________________________________________________

Describe any any effect mediators (things that altered the outcomes achieved.

_________________________________________________________________________

Describe any complications or adverse events that were reported

_________________________________________________________________________

**Evaluation of Study Design**

| **Evaluation Criteria** | **Score** | | |
| --- | --- | --- | --- |
| **Study question** | 2 | 1 | 0 |
| 1. Was there relevant and sufficient background work cited that led to a clear research question? |  |  |  |
| **Study design** |  |  |  |
| 2. Was a comparison group used? |  |  |  |
| 3. Was patient status at more than 1 time point considered? |  |  |  |
| 4. Was data collection performed prospectively? |  |  |  |
| 5. Were patients randomized to groups? |  |  |  |
| 6. Was allocation concealed? |  |  |  |
| 7. Were patients blinded to the extent possible? |  |  |  |
| 8. Were treatment providers blinded to the extent possible? |  |  |  |
| 9. Was an independent evaluator used to administer outcome measures? |  |  |  |
| **Subjects** |  |  |  |
| 10. Did sampling procedures minimize sample/selection biases? |  |  |  |
| 11. Were inclusion/exclusion criteria defined? |  |  |  |
| 12. Was an appropriate enrollment obtained? |  |  |  |
| 13. Was appropriate retention/follow-up obtained? |  |  |  |
| **Intervention** |  |  |  |
| 14. Was the intervention applied according to established principles? |  |  |  |
| 15. Were biases due to the treatment provider minimized (i.e. attention, training)? |  |  |  |
| 16. Was the intervention compared to an appropriate comparator? |  |  |  |
| **Outcomes** |  |  |  |
| 17. Was an appropriate primary outcome defined? |  |  |  |
| 18. Were appropriate secondary outcomes considered? |  |  |  |
| 19. Was an appropriate follow-up period incorporated? |  |  |  |
| **Analysis** |  |  |  |
| 20. Was an appropriate statistical test(s) performed to indicate differences related to the intervention? |  |  |  |
| 21. Was it established that the study had significant power to identify treatment effects? |  |  |  |
| 22. Was the the size and clinical importance of the treatment group differences reported? |  |  |  |
| 23. Were missing data accounted for and considered in analyses? |  |  |  |
| 24. Were treatment benefits, adverse events and costs/implementation considerations addressed? |  |  |  |
| **Recommendations** |  |  |  |
| 25. Were the conclusions/clinical recommendations supported by the study objectives, analysis and results? |  |  |  |
| Total Quality Score (Sum of above) = |  |  |  |
| The total score can be reported out of 100% -- total sum/25 x 100% |  | | |

© Joy MacDermid 2013

Notes:

Additional file 1. Table 3. Quality appraisal

|  |  |  | | | | | | | |  | | | |  | | |  | | |  | | | | |  |  |  |
| --- | --- | --- | --- | --- | --- | --- | --- | --- | --- | --- | --- | --- | --- | --- | --- | --- | --- | --- | --- | --- | --- | --- | --- | --- | --- | --- | --- |
| **Items** | **?*** | **Study Design** | | | | | | | | **Subjects** | | | | **Intervention** | | | **Outcomes** | | | **Analysis** | | | | | **R** | **T** | **Q%** |
| **Study** | 1 | 2 | 3 | 4 | 5 | 6 | 7 | 8 | 9 | 10 | 11 | 12 | 13 | 14 | 15 | 16 | 17 | 18 | 19 | 20 | 21 | 22 | 23 | 24 | 25 |  |  |
| Alp 2009 | 2 | 2 | 2 | 2 | 2 | 1 | 1 | 1 | 2 | 2 | 1 | 0 | 2 | 2 | 1 | 2 | 1 | 1 | 1 | 2 | 0 | 0 | 2 | 0 | 1 | 33 | 66% |
| Angin 2015 | 2 | 2 | 2 | 2 | 1 | 1 | 1 | 1 | 0 | 1 | 2 | 2 | 2 | 1 | 1 | 2 | 1 | 1 | 1 | 2 | 2 | 2 | 2 | 0 | 1 | 35 | 70% |
| Arnold 2008 | 2 | 2 | 2 | 2 | 2 | 1 | 1 | 1 | 1 | 2 | 2 | 2 | 1 | 2 | 1 | 2 | 1 | 1 | 1 | 2 | 2 | 2 | 2 | 1 | 1 | 39 | 78% |
| Basat 2013 | 1 | 2 | 2 | 2 | 2 | 1 | 1 | 1 | 0 | 2 | 2 | 0 | 1 | 2 | 0 | 2 | 1 | 1 | 1 | 2 | 0 | 0 | 0 | 0 | 1 | 27 | 54% |
| Bennell 2010 | 2 | 2 | 2 | 2 | 2 | 2 | 1 | 1 | 2 | 2 | 2 | 0 | 2 | 2 | 2 | 2 | 1 | 1 | 1 | 2 | 0 | 2 | 2 | 1 | 1 | 39 | 78% |
| Bergland 2011 | 2 | 2 | 2 | 2 | 2 | 2 | 1 | 1 | 2 | 2 | 2 | 2 | 2 | 2 | 2 | 2 | 1 | 1 | 1 | 2 | 2 | 2 | 2 | 1 | 1 | 43 | 86% |
| Borba-Pinheiro 2016 | 1 | 2 | 2 | 1 | 1 | 1 | 1 | 1 | 0 | 2 | 2 | 2 | 1 | 2 | 0 | 2 | 1 | 1 | 1 | 2 | 2 | 2 | 0 | 0 | 1 | 31 | 62% |
| Bravo 1996 | 2 | 2 | 2 | 2 | 2 | 1 | 1 | 1 | 2 | 1 | 2 | 2 | 1 | 1 | 1 | 2 | 1 | 1 | 1 | 2 | 1 | 1 | 2 | 0 | 1 | 35 | 70% |
| Chien 2005 | 1 | 2 | 2 | 1 | 1 | 1 | 1 | 1 | 2 | 2 | 1 | 0 | 1 | 1 | 1 | 2 | 1 | 1 | 1 | 1 | 0 | 0 | 2 | 2 | 1 | 29 | 58% |
| Chyu 2010 | 2 | 2 | 2 | 1 | 1 | 2 | 1 | 1 | 2 | 2 | 2 | 1 | 1 | 2 | 1 | 2 | 1 | 1 | 1 | 2 | 0 | 1 | 0 | 1 | 1 | 33 | 66% |
| Devereux 2005 | 1 | 2 | 2 | 2 | 0 | 2 | 1 | 1 | 0 | 0 | 2 | 2 | 1 | 2 | 1 | 2 | 1 | 1 | 1 | 2 | 2 | 2 | 2 | 0 | 1 | 33 | 66% |
| Evstigneeva 2016 | 2 | 2 | 2 | 2 | 2 | 2 | 1 | 1 | 2 | 2 | 2 | 2 | 1 | 2 | 2 | 2 | 1 | 1 | 1 | 2 | 1 | 0 | 1 | 1 | 1 | 38 | 76% |
| Fleisher 2011 | 1 | 2 | 2 | 2 | 1 | 2 | 1 | 1 | 0 | 2 | 2 | 0 | 1 | 2 | 0 | 2 | 1 | 1 | 1 | 2 | 1 | 0 | 2 | 0 | 1 | 30 | 60% |
| Gianoudis 2014 | 2 | 2 | 2 | 2 | 2 | 2 | 1 | 1 | 2 | 2 | 2 | 2 | 2 | 2 | 2 | 2 | 1 | 1 | 1 | 2 | 2 | 1 | 2 | 1 | 1 | 42 | 84% |
| Gold 2004 | 2 | 2 | 2 | 2 | 2 | 2 | 2 | 2 | 2 | 2 | 2 | 2 | 2 | 1 | 2 | 2 | 1 | 1 | 1 | 2 | 2 | 1 | 2 | 1 | 1 | 43 | 86% |
| Halvarsson 2014 | 2 | 2 | 2 | 2 | 2 | 2 | 1 | 1 | 1 | 2 | 2 | 2 | 0 | 1 | 1 | 2 | 1 | 1 | 1 | 2 | 1 | 1 | 2 | 0 | 1 | 35 | 70% |
| Hongo 2007 | 1 | 2 | 2 | 2 | 1 | 1 | 1 | 1 | 0 | 2 | 2 | 2 | 2 | 1 | 1 | 2 | 1 | 1 | 1 | 2 | 1 | 1 | 1 | 1 | 1 | 33 | 66% |
| Kanemaru 2010 | 1 | 2 | 2 | 2 | 1 | 1 | 1 | 1 | 0 | 0 | 2 | 0 | 1 | 0 | 0 | 2 | 1 | 1 | 1 | 2 | 1 | 0 | 1 | 1 | 1 | 25 | 50% |
| Kronhed 2009 | 2 | 2 | 2 | 2 | 1 | 2 | 1 | 1 | 2 | 2 | 2 | 2 | 2 | 1 | 1 | 2 | 1 | 1 | 1 | 2 | 0 | 1 | 1 | 1 | 1 | 36 | 72% |
| Maciaszek 2012 | 1 | 2 | 2 | 2 | 1 | 1 | 1 | 1 | 0 | 0 | 2 | 0 | 0 | 2 | 0 | 2 | 1 | 1 | 1 | 0 | 0 | 0 | 1 | 1 | 1 | 23 | 46% |
| Madureira 2010 | 2 | 2 | 2 | 2 | 1 | 1 | 1 | 1 | 2 | 1 | 2 | 2 | 2 | 2 | 1 | 2 | 1 | 1 | 1 | 1 | 0 | 0 | 0 | 2 | 1 | 33 | 66% |
| Marchese 2012 | 2 | 2 | 2 | 2 | 2 | 1 | 1 | 1 | 0 | 1 | 2 | 0 | 2 | 1 | 1 | 1 | 1 | 1 | 1 | 1 | 0 | 0 | 1 | 1 | 1 | 28 | 56% |
| Nelson 1994 | 2 | 2 | 2 | 2 | 1 | 1 | 1 | 1 | 1 | 1 | 2 | 0 | 2 | 1 | 1 | 2 | 1 | 1 | 1 | 2 | 0 | 0 | 2 | 1 | 1 | 31 | 62% |
| Papaioannou 2003 | 2 | 2 | 2 | 2 | 1 | 1 | 1 | 1 | 2 | 2 | 2 | 0 | 1 | 1 | 2 | 2 | 1 | 1 | 1 | 2 | 0 | 1 | 2 | 0 | 1 | 33 | 66% |
| Smulders 2010 | 2 | 2 | 2 | 2 | 1 | 2 | 1 | 1 | 2 | 2 | 2 | 2 | 2 | 2 | 2 | 2 | 1 | 1 | 1 | 2 | 2 | 1 | 2 | 1 | 1 | 41 | 82% |
| Teixeira 2010 | 2 | 2 | 2 | 2 | 2 | 2 | 1 | 1 | 2 | 2 | 2 | 0 | 1 | 2 | 2 | 2 | 1 | 1 | 1 | 2 | 0 | 1 | 1 | 1 | 1 | 36 | 72% |
| Tolomio 2010 | 1 | 2 | 2 | 2 | 1 | 1 | 1 | 1 | 2 | 2 | 2 | 0 | 1 | 1 | 2 | 2 | 1 | 1 | 1 | 2 | 0 | 1 | 1 | 1 | 1 | 32 | 64% |
| Wayne 2012 | 2 | 2 | 2 | 2 | 1 | 1 | 1 | 1 | 2 | 1 | 1 | 1 | 1 | 1 | 1 | 1 | 1 | 1 | 1 | 1 | 1 | 1 | 1 | 1 | 1 | 30 | 60% |
| ?* Research question; R Recommendation; T Total score | | | | | | | | | |  |  |  |  |  |  |  |  |  |  |  |  |  |  |  |  |  |  |

|  |  |  |  |  |
| --- | --- | --- | --- | --- |
